# Supplementary material for: Effect of solvent on the emulsion and morphology of polyfluorene films: all-atom molecular dynamics approach
Source: Royal Society of Chemistry journal article supplement (doi:10.1039/d2sm01001a), 2023-01-01

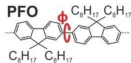

$\alpha$ -phase: random  $\phi$

$\beta$ -phase:  $160^\circ < \phi < 180^\circ$

Dihedral angle at initial  
state of simulation:  $165^\circ$

TCB

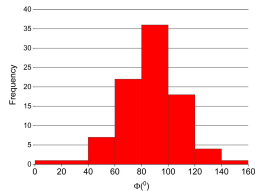

TMB

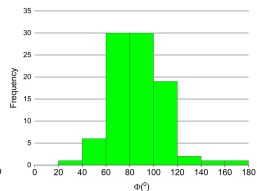

DCB

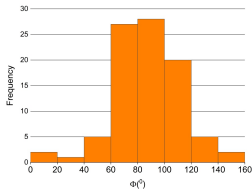

TOL

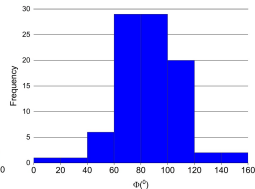

CPN

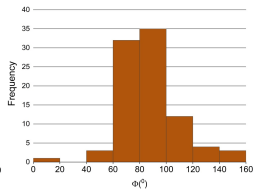

Supplement: d2sm01001a2.pdf [file d2sm01001a2.pdf]
