# Supplementary material for: Effect of solvent on the emulsion and morphology of polyfluorene films: all-atom molecular dynamics approach
Source: Royal Society of Chemistry journal article supplement (doi:10.1039/d2sm01001a), 2023-01-01
Supplement: d2sm01001a3.pdf [file d2sm01001a3.pdf]

Supporting Information

## Effect of Solvent on the Emulsion and Morphology of Polyfluorene Films: All-atom molecular dynamics approach

Sabila K. Pinky<sup>a</sup>, Albert L. Kwansa<sup>a</sup>, Buang Zhang<sup>b</sup>, Adrienne D. Stiff-Roberts<sup>\*b</sup> and Yaroslava G. Yingling<sup>\*a</sup>

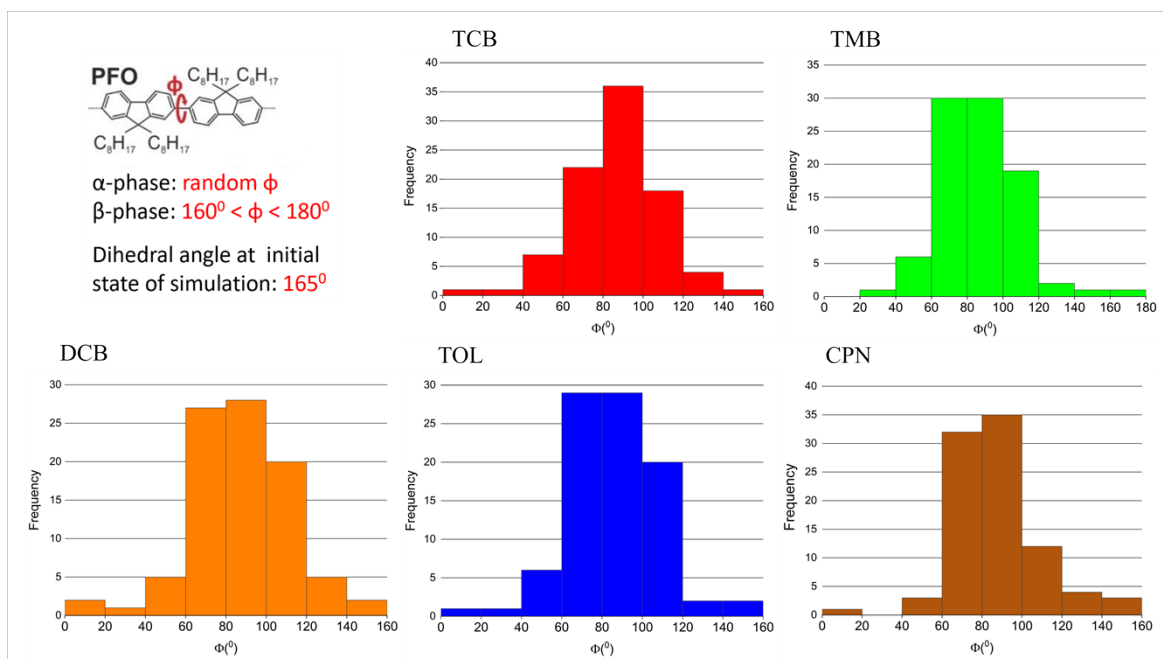

Figure S1 Histogram of backbone dihedral angle at final state for all the chains in the systems with different solvents.

### Materials

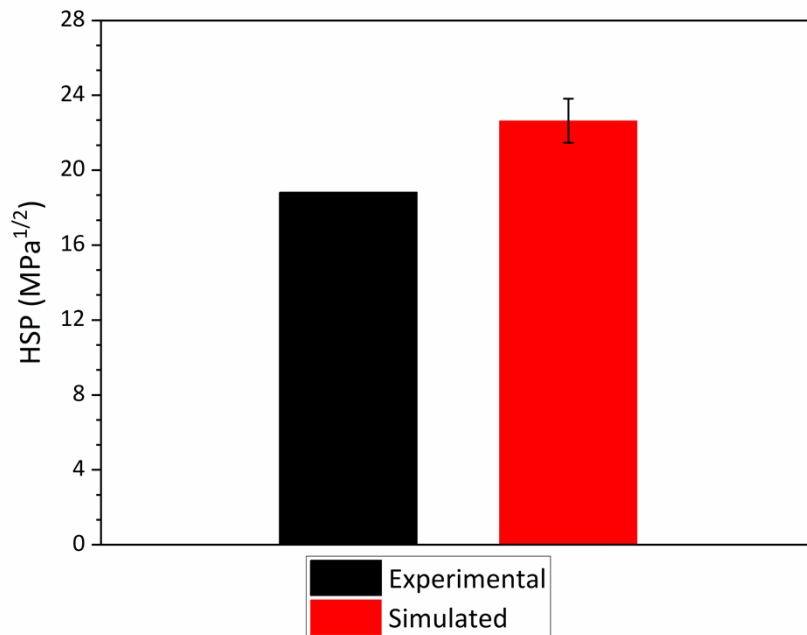

Figure S2 Total Hansen Solubility Parameter (HSP) for a pure PFO polymer system simulated using the GAFF2 force field (10 x 10-mer chains, 300 K, 1 atm) compared to an experimental reference value for PFO based on an average of total HSPs for chloroform and tetrahydrofuran from Grell et. al.<sup>1</sup>

Table S1 Details of the simulation systems (PFO = polyfluorene polymer, PS = primary solvent, SS = secondary solvent, and WAT = water)

| Solvent name | No. of total atoms | Mass fraction |       |       |       | No. of atoms |      |     |      |
|--------------|--------------------|---------------|-------|-------|-------|--------------|------|-----|------|
|              |                    | PFO           | PS    | SS    | WAT   | PFO          | PS   | SS  | WAT  |
| TCB          | 12391              | 0.5           | 0.118 | 0.029 | 0.353 | 6920         | 600  | 299 | 4572 |
| TMB          | 13387              | 0.5           | 0.118 | 0.029 | 0.353 | 6920         | 1596 | 299 | 4572 |
| DCB          | 12535              | 0.5           | 0.118 | 0.029 | 0.353 | 6920         | 744  | 299 | 4572 |
| CPN          | 13667              | 0.5           | 0.118 | 0.029 | 0.353 | 6920         | 1876 | 299 | 4572 |
| TOL          | 13276              | 0.5           | 0.118 | 0.029 | 0.353 | 6920         | 1485 | 299 | 4572 |

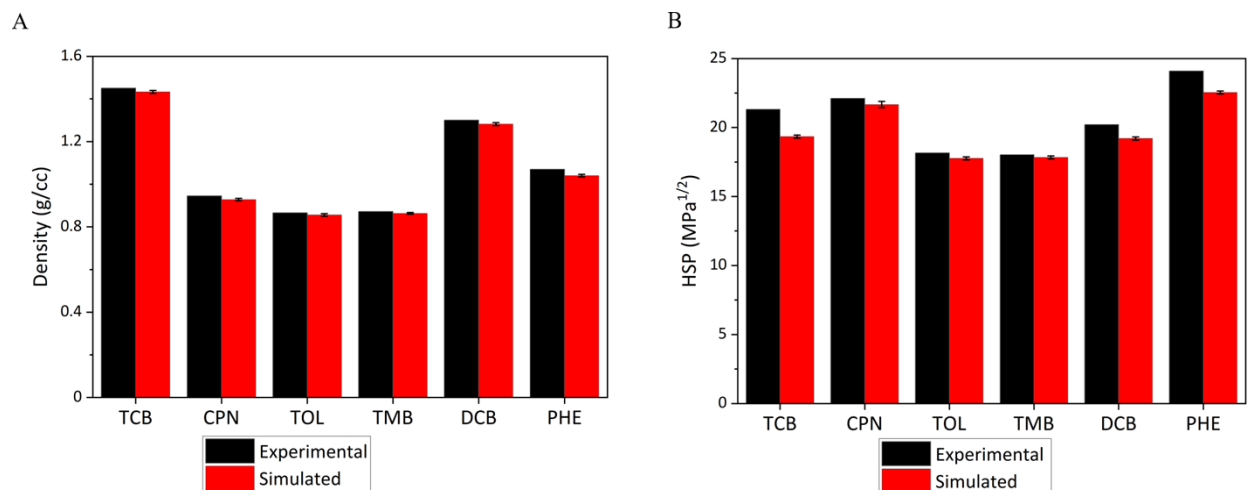

Figure S3 A) Density comparison and B) total Hansen Solubility Parameter (HSP) comparison for pure solvent systems using the GAFF2 force field. Experimental data were collected from different online sources<sup>2,3</sup>

Table S2 Solvent properties calculated from MD simulations.

| Primary solvent | Chemical formula                                              | Density (g/cc) | DM* (debye)  | Total HSP** (MPa <sup>1/2</sup> ) |
|-----------------|---------------------------------------------------------------|----------------|--------------|-----------------------------------|
| TCB             | C <sub>6</sub> H <sub>3</sub> Cl <sub>3</sub>                 | 1.433±0.0067   | 1.756±0.0082 | 17.405±0.106                      |
| TMB             | C <sub>6</sub> H <sub>3</sub> (CH <sub>3</sub> ) <sub>3</sub> | 0.863±0.0006   | 0.34±0.0043  | 16.05±0.107                       |
| DCB             | C <sub>6</sub> H <sub>4</sub> Cl <sub>2</sub>                 | 1.28±0.0069    | 3.38±0.0027  | 17.28±0.111                       |
| TOL             | C <sub>6</sub> H <sub>5</sub> CH <sub>3</sub>                 | 0.856±0.0058   | 0.32±0.0014  | 15.99±0.131                       |
| CPN             | C <sub>5</sub> H <sub>8</sub> O                               | 0.928±0.006    | 3.392±0.0029 | 19.50±0.161                       |

\*DM is denoted for molecular dipole moment

\*\*HSP is denoted for Hansen Solubility Parameter

Table S3 Partial charges for all the components used for emulsion systems

| Components | Formula    | C       | H      | Cl      | O       |
|------------|------------|---------|--------|---------|---------|
| TCB        | C6H3Cl3    | 0.0557  | 0.1241 | -0.0882 |         |
|            |            | 0.0343  | 0.1448 | -0.0848 |         |
|            |            | -0.0144 | 0.1476 | -0.0916 |         |
|            |            | 0.0318  |        |         |         |
|            |            | -0.0694 |        |         |         |
|            |            | -0.1263 |        |         |         |
| TMB        | C9H12      | -0.2009 | 0.0632 |         |         |
|            |            | -0.2160 | 0.0704 |         |         |
|            |            | -0.1415 | 0.0511 |         |         |
|            |            | 0.1209  | 0.1580 |         |         |
|            |            | 0.0655  | 0.1528 |         |         |
|            |            | -0.2648 | 0.1745 |         |         |
|            |            | 0.0916  |        |         |         |
|            |            | -0.2065 |        |         |         |
| DCB        | C6H6Cl2    | 0.0639  | 0.1303 | -0.1054 |         |
|            |            | -0.0903 | 0.1520 |         |         |
|            |            | -0.1505 |        |         |         |
| CPN        | C5H8O      | 0.5667  | 0.0400 |         | -0.5623 |
|            |            | -0.0907 | 0.0164 |         |         |
|            |            | -0.0243 |        |         |         |
| TOL        | C7H8       | -0.2576 | 0.0790 |         |         |
|            |            | 0.1247  | 0.1251 |         |         |
|            |            | -0.1467 | 0.1424 |         |         |
|            |            | -0.1859 | 0.1207 |         |         |
|            |            | -0.0946 |        |         |         |
| PHE        | C6H6O      | 0.2688  | 0.3786 |         | -0.5305 |
|            |            | -0.1719 | 0.1396 |         |         |
|            |            | -0.1818 | 0.1510 |         |         |
|            |            | -0.1121 | 0.1214 |         |         |
| PFO        | (C29H42)10 | -0.0303 | 0.1428 |         |         |
|            |            | -0.0799 | 0.1991 |         |         |
|            |            | -0.4082 | 0.2049 |         |         |
|            |            | 0.2568  | 0.1425 |         |         |
|            |            | -0.3967 | 0.1388 |         |         |
|            |            | 0.0679  | 0.1455 |         |         |
|            |            | -0.0163 | 0.1319 |         |         |
|            |            | -0.1759 | 0.0184 |         |         |
|            |            | -0.1325 | 0.0108 |         |         |
|            |            | -0.1936 | 0.0032 |         |         |

|  |  |         |         |  |  |
|--|--|---------|---------|--|--|
|  |  | -0.1436 | -0.0016 |  |  |
|  |  | 0.0923  | -0.0041 |  |  |
|  |  | 0.0691  | 0.0007  |  |  |
|  |  | -0.0685 | -0.0038 |  |  |
|  |  | -0.0030 | 0.0138  |  |  |
|  |  | -0.0044 | 0.1378  |  |  |
|  |  | 0.0085  | 0.1990  |  |  |
|  |  | -0.0034 | 0.0110  |  |  |
|  |  | 0.0081  | 0.0111  |  |  |
|  |  | 0.0362  | 0.0033  |  |  |
|  |  | -0.0730 | -0.0028 |  |  |
|  |  | -0.0365 | -0.0041 |  |  |
|  |  | -0.0775 | 0.0015  |  |  |
|  |  | -0.4059 | -0.0027 |  |  |
|  |  | 0.2581  | 0.0146  |  |  |
|  |  | -0.4077 |         |  |  |
|  |  | 0.0778  |         |  |  |
|  |  | 0.1020  |         |  |  |
|  |  | -0.0503 |         |  |  |
|  |  | 0.0054  |         |  |  |
|  |  | -0.0078 |         |  |  |
|  |  | 0.0079  |         |  |  |
|  |  | -0.0019 |         |  |  |
|  |  | 0.0071  |         |  |  |
|  |  | 0.0335  |         |  |  |
|  |  | -0.0748 |         |  |  |

Table S4: Statistics of the RESP partial charge fitting for the end and middle polymer fragments using intramolecular charge constraints. These statistics are based on quantum mechanics (QM) electrostatic potential (ESP) data and ESP data calculated from the fitted atomic partial charges, after the second stage of the RESP fitting procedure. For both fragments, there were 71 atoms and 2,553 ESP grid points

| Statistic                                                                                                                                                                                                                                                                                                                                      | End fragment | Middle fragment |
|------------------------------------------------------------------------------------------------------------------------------------------------------------------------------------------------------------------------------------------------------------------------------------------------------------------------------------------------|--------------|-----------------|
| <p>“The initial sum of squares (ssvpot)”</p> $ssvpot = \sum_j (V_j^{QM})^2$ <p><math>V_j^{QM}</math> = ESP at grid point <math>j</math> from QM</p>                                                                                                                                                                                            | 0.234        | 0.234           |
| <p>“The residual sum of squares (chipot)”</p> $chipot = \chi^2 = \sum_j (V_j^{QM} - V_j^{calc})^2$ <p><math>V_j^{calc}</math> = ESP at grid point <math>j</math> from atomic charges, <math>q_i</math></p>                                                                                                                                     | 0.017        | 0.019           |
| <p>“The std err of estimate (sqrt(chipot/N))”</p> $RMS\ error = \sqrt{\frac{chipot}{N_{grid\ points}}}$ <p><math>N_{grid\ points}</math> = Number of grid points (2,553)</p>                                                                                                                                                                   | 0.00185      | 0.00195         |
| <p>“ESP relative RMS (SQRT(chipot/ssvpot))”</p> $RRMS\ error = \sqrt{\frac{chipot}{ssvpot}}$                                                                                                                                                                                                                                                   | 0.27257      | 0.28777         |
| <p>“The [squared] Pearson correlation coefficient (<math>r^2</math>)”</p> $R^2 = \left( \frac{\sum_j (V_j^{QM} V_j^{calc}) - \sum_j (V_j^{QM}) \sum_j (V_j^{calc})}{\sqrt{\left( \sum_j ((V_j^{QM})^2) - \left( \sum_j (V_j^{QM}) \right)^2 \right) \left( \sum_j ((V_j^{calc})^2) - \left( \sum_j (V_j^{calc}) \right)^2 \right)}} \right)^2$ | 0.92316      | 0.91438         |

Table S5 Experimental and simulation data for emulsions with different primary solvents.

| Primary solvent | Experimental data[25]        |                        | Simulated data                       |                                      |                                          |
|-----------------|------------------------------|------------------------|--------------------------------------|--------------------------------------|------------------------------------------|
|                 | Solubility-in-water (g/100g) | Film roughness, R (nm) | PS-WAT interaction energy (kcal/mol) | PS-PFO interaction energy (kcal/mol) | Interaction energy ratio (PS-PFO:PS-WAT) |
| TCB             | 0.00488                      | 15.2±3.7               | -65.77±8.23                          | -495.76±40.66                        | 7.537±0.17                               |
| TMB             | 0.0057                       | 177.7±25.3             | -113.09±14.40                        | -508.91±49.54                        | 4.500±0.12                               |
| DCB             | 0.0156                       | 37.6±8.5               | -161.08±11.67                        | -836.09±51.23                        | 5.190±0.05                               |
| TOL             | 0.053                        | 250.4±32.3             | -242.17±17.64                        | -735.56±30.26                        | 3.037±0.02                               |
| CPN             | 0.9175                       | 422±154.6              | -1195.753±39.24                      | -610.33±37.64                        | 0.510±0.002                              |

References:

- 1 M. Grell, D. D. C. Bradley, X. Long, T. Chamberlain, M. Inbasekaran, E. P. Woo and M. Soliman, *Acta Polym.*, 1998, **49**, 439–444.
- 2 C. M. Hansen, *Hansen solubility parameters: a user's handbook*, CRC press, 2007.
- 3 C. L. Yaws, *Yaws' Critical Property Data for Chemical Engineers and Chemists*, Knovel, 2012.
